# Supplementary material for: Long-term ecological surveillance of hard ticks (Acari: Ixodidae) and SFTSV in Dangjin, South Korea (2018–2024)
Source: Parasit Vectors. 2026 Mar 30;19:204. doi: 10.1186/s13071-026-07338-9 (PMC13159334; doi:10.1186/s13071-026-07338-9)
Supplement: Supplementary file 1 — Additional file 1. [file 13071_2026_7338_MOESM1_ESM.xlsx]

## Sheet: Sheet1
Year	Month	Collection Date	Environment	Species	Developmental Stage	Number of Individuals	Number of Experimental Ticks	Pool No.	Positive Pools
2018	April	2018-04-17	Grassland	Haemaphysalis longicornis	Female	15	7.5	2	0
2018	April	2018-04-17	Grassland	Haemaphysalis longicornis	Male	20	10	2	0
2018	April	2018-04-17	Grassland	Haemaphysalis longicornis	Nymph	571	285.5	10	0
2018	April	2018-04-17	Grassland	Haemaphysalis flava	Female	1	0.5	1	0
2018	April	2018-04-17	Grassland	Haemaphysalis flava	Nymph	5	2.5	1	0
2018	April	2018-04-17	Grassland	Haemaphysalis spp.	Larva	8	4	1	0
2018	April	2018-04-17	Mountain road	Haemaphysalis longicornis	Female	8	4	1	0
2018	April	2018-04-17	Mountain road	Haemaphysalis longicornis	Male	4	2	1	0
2018	April	2018-04-17	Mountain road	Haemaphysalis longicornis	Nymph	14	7	1	0
2018	April	2018-04-17	Mountain road	Haemaphysalis flava	Female	1	0.5	1	0
2018	April	2018-04-17	Mountain road	Haemaphysalis flava	Male	2	1	1	0
2018	April	2018-04-17	Mountain road	Haemaphysalis flava	Nymph	2	1	1	0
2018	April	2018-04-17	Mountain road	Haemaphysalis spp.	Larva	69	34.5	1	0
2018	April	2018-04-17	Mixed forest	Haemaphysalis longicornis	Female	27	13.5	3	0
2018	April	2018-04-17	Mixed forest	Haemaphysalis longicornis	Male	12	6	2	0
2018	April	2018-04-17	Mixed forest	Haemaphysalis longicornis	Nymph	177	88.5	3	0
2018	April	2018-04-17	Mixed forest	Haemaphysalis flava	Female	8	4	1	0
2018	April	2018-04-17	Mixed forest	Haemaphysalis flava	Male	2	1	1	0
2018	April	2018-04-17	Mixed forest	Haemaphysalis flava	Nymph	11	5.5	1	0
2018	April	2018-04-17	Mixed forest	Haemaphysalis spp.	Larva	30	15	1	0
2018	April	2018-04-17	Cemetery	Haemaphysalis longicornis	Female	5	2.5	1	0
2018	April	2018-04-17	Cemetery	Haemaphysalis longicornis	Male	5	2.5	1	0
2018	April	2018-04-17	Cemetery	Haemaphysalis longicornis	Nymph	122	61	3	0
2018	May	2018-05-21	Grassland	Haemaphysalis longicornis	Female	85	42.5	9	0
2018	May	2018-05-21	Grassland	Haemaphysalis longicornis	Male	75	37.5	8	0
2018	May	2018-05-21	Grassland	Haemaphysalis longicornis	Nymph	600	300	10	0
2018	May	2018-05-21	Grassland	Haemaphysalis spp.	Larva	100	50	1	0
2018	May	2018-05-21	Grassland	Ixodes nipponensis	Nymph	1	0.5	1	0
2018	May	2018-05-21	Mountain road	Haemaphysalis longicornis	Female	82	41	9	0
2018	May	2018-05-21	Mountain road	Haemaphysalis longicornis	Male	29	14.5	3	0
2018	May	2018-05-21	Mountain road	Haemaphysalis longicornis	Nymph	142	71	3	0
2018	May	2018-05-21	Mountain road	Haemaphysalis flava	Female	4	2	1	0
2018	May	2018-05-21	Mountain road	Haemaphysalis flava	Nymph	9	4.5	1	0
2018	May	2018-05-21	Mountain road	Haemaphysalis spp.	Larva	324	162	4	0
2018	May	2018-05-21	Mixed forest	Haemaphysalis longicornis	Female	97	48.5	10	0
2018	May	2018-05-21	Mixed forest	Haemaphysalis longicornis	Male	47	23.5	5	0
2018	May	2018-05-21	Mixed forest	Haemaphysalis longicornis	Nymph	144	72	3	0
2018	May	2018-05-21	Mixed forest	Haemaphysalis flava	Female	4	2	1	0
2018	May	2018-05-21	Mixed forest	Haemaphysalis flava	Male	1	0.5	1	0
2018	May	2018-05-21	Mixed forest	Haemaphysalis flava	Nymph	6	3	1	0
2018	May	2018-05-21	Mixed forest	Haemaphysalis spp.	Larva	152	76	2	0
2018	May	2018-05-21	Cemetery	Haemaphysalis longicornis	Female	54	27	6	0
2018	May	2018-05-21	Cemetery	Haemaphysalis longicornis	Male	39	19.5	4	0
2018	May	2018-05-21	Cemetery	Haemaphysalis longicornis	Nymph	725	362.5	13	0
2018	May	2018-05-21	Cemetery	Haemaphysalis flava	Female	1	0.5	1	0
2018	May	2018-05-21	Cemetery	Haemaphysalis flava	Nymph	1	0.5	1	0
2018	May	2018-05-21	Cemetery	Haemaphysalis spp.	Larva	2	1	1	0
2018	June	2018-06-19	Grassland	Haemaphysalis longicornis	Female	62	31	7	0
2018	June	2018-06-19	Grassland	Haemaphysalis longicornis	Male	28	14	3	0
2018	June	2018-06-19	Grassland	Haemaphysalis longicornis	Nymph	139	69.5	3	0
2018	June	2018-06-19	Grassland	Haemaphysalis spp.	Larva	1	0.5	1	0
2018	June	2018-06-19	Mountain road	Haemaphysalis longicornis	Female	171	85.5	18	0
2018	June	2018-06-19	Mountain road	Haemaphysalis longicornis	Male	32	16	4	0
2018	June	2018-06-19	Mountain road	Haemaphysalis longicornis	Nymph	17	8.5	1	0
2018	June	2018-06-19	Mountain road	Haemaphysalis flava	Female	1	0.5	1	0
2018	June	2018-06-19	Mountain road	Haemaphysalis flava	Nymph	3	1.5	1	0
2018	June	2018-06-19	Mountain road	Haemaphysalis spp.	Larva	1	0.5	1	0
2018	June	2018-06-19	Mixed forest	Haemaphysalis longicornis	Female	267	133.5	27	0
2018	June	2018-06-19	Mixed forest	Haemaphysalis longicornis	Male	74	37	8	0
2018	June	2018-06-19	Mixed forest	Haemaphysalis longicornis	Nymph	58	29	1	0
2018	June	2018-06-19	Mixed forest	Haemaphysalis flava	Female	1	0.5	1	0
2018	June	2018-06-19	Mixed forest	Haemaphysalis flava	Male	1	0.5	1	0
2018	June	2018-06-19	Mixed forest	Haemaphysalis flava	Nymph	7	3.5	1	0
2018	June	2018-06-19	Cemetery	Haemaphysalis longicornis	Female	53	26.5	6	0
2018	June	2018-06-19	Cemetery	Haemaphysalis longicornis	Male	23	11.5	3	0
2018	June	2018-06-19	Cemetery	Haemaphysalis longicornis	Nymph	82	41	2	0
2018	June	2018-06-19	Cemetery	Haemaphysalis spp.	Larva	3	1.5	1	0
2018	July	2018-07-11	Grassland	Haemaphysalis longicornis	Female	183	91.5	19	0
2018	July	2018-07-11	Grassland	Haemaphysalis longicornis	Male	67	33.5	7	0
2018	July	2018-07-11	Grassland	Haemaphysalis longicornis	Nymph	122	61	3	0
2018	July	2018-07-11	Mountain road	Haemaphysalis longicornis	Female	450	225	45	0
2018	July	2018-07-11	Mountain road	Haemaphysalis longicornis	Male	90	45	9	0
2018	July	2018-07-11	Mountain road	Haemaphysalis longicornis	Nymph	57	28.5	1	0
2018	July	2018-07-11	Mountain road	Haemaphysalis flava	Nymph	3	1.5	1	0
2018	July	2018-07-11	Mountain road	Haemaphysalis spp.	Larva	74	37	1	0
2018	July	2018-07-11	Mountain road	Ixodes nipponensis	Nymph	2	1	1	0
2018	July	2018-07-11	Mixed forest	Haemaphysalis longicornis	Female	721	360.5	73	0
2018	July	2018-07-11	Mixed forest	Haemaphysalis longicornis	Male	165	82.5	17	0
2018	July	2018-07-11	Mixed forest	Haemaphysalis longicornis	Nymph	87	43.5	2	0
2018	July	2018-07-11	Mixed forest	Haemaphysalis spp.	Larva	96	48	1	0
2018	July	2018-07-11	Cemetery	Haemaphysalis longicornis	Female	185	92.5	19	0
2018	July	2018-07-11	Cemetery	Haemaphysalis longicornis	Male	63	31.5	7	0
2018	July	2018-07-11	Cemetery	Haemaphysalis longicornis	Nymph	44	22	1	0
2018	July	2018-07-11	Cemetery	Haemaphysalis spp.	Larva	5	2.5	1	0
2018	August	2018-08-16	Grassland	Haemaphysalis longicornis	Female	21	10.5	3	0
2018	August	2018-08-16	Grassland	Haemaphysalis longicornis	Male	4	2	1	0
2018	August	2018-08-16	Grassland	Haemaphysalis longicornis	Nymph	16	8	1	0
2018	August	2018-08-16	Grassland	Haemaphysalis spp.	Larva	296	148	3	0
2018	August	2018-08-16	Mountain road	Haemaphysalis longicornis	Female	23	11.5	3	0
2018	August	2018-08-16	Mountain road	Haemaphysalis longicornis	Male	2	1	1	0
2018	August	2018-08-16	Mountain road	Haemaphysalis longicornis	Nymph	128	64	3	0
2018	August	2018-08-16	Mountain road	Haemaphysalis flava	Male	3	1.5	1	0
2018	August	2018-08-16	Mountain road	Haemaphysalis spp.	Larva	253	126.5	3	0
2018	August	2018-08-16	Mixed forest	Haemaphysalis longicornis	Female	43	21.5	5	0
2018	August	2018-08-16	Mixed forest	Haemaphysalis longicornis	Male	6	3	1	0
2018	August	2018-08-16	Mixed forest	Haemaphysalis longicornis	Nymph	2	1	1	0
2018	August	2018-08-16	Mixed forest	Haemaphysalis flava	Nymph	3	1.5	1	0
2018	August	2018-08-16	Mixed forest	Haemaphysalis spp.	Larva	724	362	8	0
2018	August	2018-08-16	Cemetery	Haemaphysalis longicornis	Female	11	5.5	2	0
2018	August	2018-08-16	Cemetery	Haemaphysalis spp.	Larva	10	5	1	0
2018	September	2018-09-12	Grassland	Haemaphysalis longicornis	Nymph	58	29	1	0
2018	September	2018-09-12	Grassland	Haemaphysalis flava	Male	4	2	1	0
2018	September	2018-09-12	Grassland	Haemaphysalis spp.	Larva	1660	830	17	0
2018	September	2018-09-12	Mountain road	Haemaphysalis longicornis	Female	1	0.5	1	0
2018	September	2018-09-12	Mountain road	Haemaphysalis longicornis	Male	2	1	1	0
2018	September	2018-09-12	Mountain road	Haemaphysalis longicornis	Nymph	17	8.5	1	0
2018	September	2018-09-12	Mountain road	Haemaphysalis flava	Female	16	8	2	0
2018	September	2018-09-12	Mountain road	Haemaphysalis flava	Male	5	2.5	1	0
2018	September	2018-09-12	Mountain road	Haemaphysalis flava	Nymph	8	4	1	0
2018	September	2018-09-12	Mountain road	Haemaphysalis spp.	Larva	983	491.5	10	0
2018	September	2018-09-12	Mixed forest	Haemaphysalis longicornis	Female	7	3.5	1	0
2018	September	2018-09-12	Mixed forest	Haemaphysalis longicornis	Male	1	0.5	1	0
2018	September	2018-09-12	Mixed forest	Haemaphysalis longicornis	Nymph	28	14	1	0
2018	September	2018-09-12	Mixed forest	Haemaphysalis flava	Female	4	2	1	0
2018	September	2018-09-12	Mixed forest	Haemaphysalis flava	Male	12	6	2	0
2018	September	2018-09-12	Mixed forest	Haemaphysalis flava	Nymph	7	3.5	1	0
2018	September	2018-09-12	Mixed forest	Haemaphysalis spp.	Larva	4496	2248	45	0
2018	September	2018-09-12	Cemetery	Haemaphysalis longicornis	Nymph	59	29.5	1	0
2018	September	2018-09-12	Cemetery	Haemaphysalis flava	Female	3	1.5	1	0
2018	September	2018-09-12	Cemetery	Haemaphysalis flava	Male	7	3.5	1	0
2018	September	2018-09-12	Cemetery	Haemaphysalis spp.	Larva	320	160	4	0
2018	September	2018-09-12	Cemetery	Ixodes nipponensis	Nymph	1	0.5	1	0
2018	October	2018-10-11	Grassland	Haemaphysalis longicornis	Female	1	0.5	1	0
2018	October	2018-10-11	Grassland	Haemaphysalis longicornis	Nymph	5	2.5	1	0
2018	October	2018-10-11	Grassland	Haemaphysalis flava	Female	2	1	1	0
2018	October	2018-10-11	Grassland	Haemaphysalis flava	Male	1	0.5	1	0
2018	October	2018-10-11	Grassland	Haemaphysalis flava	Nymph	7	3.5	1	0
2018	October	2018-10-11	Grassland	Haemaphysalis spp.	Larva	179	89.5	2	0
2018	October	2018-10-11	Mountain road	Haemaphysalis longicornis	Nymph	2	1	1	0
2018	October	2018-10-11	Mountain road	Haemaphysalis flava	Female	13	6.5	2	0
2018	October	2018-10-11	Mountain road	Haemaphysalis flava	Male	9	4.5	1	0
2018	October	2018-10-11	Mountain road	Haemaphysalis flava	Nymph	3	1.5	1	0
2018	October	2018-10-11	Mountain road	Haemaphysalis spp.	Larva	168	84	2	0
2018	October	2018-10-11	Mixed forest	Haemaphysalis longicornis	Female	3	1.5	1	0
2018	October	2018-10-11	Mixed forest	Haemaphysalis longicornis	Nymph	1	0.5	1	0
2018	October	2018-10-11	Mixed forest	Haemaphysalis flava	Female	11	5.5	2	0
2018	October	2018-10-11	Mixed forest	Haemaphysalis flava	Male	10	5	1	0
2018	October	2018-10-11	Mixed forest	Haemaphysalis flava	Nymph	9	4.5	1	0
2018	October	2018-10-11	Mixed forest	Haemaphysalis spp.	Larva	19	9.5	1	0
2018	October	2018-10-11	Cemetery	Haemaphysalis longicornis	Female	3	1.5	1	0
2018	October	2018-10-11	Cemetery	Haemaphysalis longicornis	Nymph	3	1.5	1	0
2018	October	2018-10-11	Cemetery	Haemaphysalis flava	Nymph	1	0.5	1	0
2018	October	2018-10-11	Cemetery	Ixodes nipponensis	Female	1	0.5	1	0
2018	November	2018-11-15	Grassland	Haemaphysalis longicornis	Female	1	0.5	1	0
2018	November	2018-11-15	Grassland	Haemaphysalis longicornis	Male	1	0.5	1	0
2018	November	2018-11-15	Grassland	Haemaphysalis longicornis	Nymph	4	2	1	0
2018	November	2018-11-15	Grassland	Ixodes nipponensis	Male	1	0.5	1	0
2018	November	2018-11-15	Mountain road	Haemaphysalis longicornis	Male	4	2	1	0
2018	November	2018-11-15	Mountain road	Haemaphysalis longicornis	Nymph	1	0.5	1	0
2018	November	2018-11-15	Mountain road	Haemaphysalis flava	Male	1	0.5	1	0
2018	November	2018-11-15	Mountain road	Haemaphysalis spp.	Larva	1	0.5	1	0
2018	November	2018-11-15	Mixed forest	Haemaphysalis longicornis	Male	2	1	1	0
2018	November	2018-11-15	Mixed forest	Haemaphysalis longicornis	Nymph	2	1	1	0
2018	November	2018-11-15	Mixed forest	Ixodes nipponensis	Male	1	0.5	1	0
2018	November	2018-11-15	Cemetery	Haemaphysalis longicornis	Female	1	0.5	1	0
2019	April	2019-04-17	Grassland	Haemaphysalis longicornis	Female	23	11.5	3	0
2019	April	2019-04-17	Grassland	Haemaphysalis longicornis	Male	26	13	3	0
2019	April	2019-04-17	Grassland	Haemaphysalis longicornis	Nymph	3017	1508.5	51	0
2019	April	2019-04-17	Grassland	Haemaphysalis flava	Female	3	1.5	1	0
2019	April	2019-04-17	Grassland	Haemaphysalis flava	Male	3	1.5	1	0
2019	April	2019-04-17	Grassland	Haemaphysalis flava	Nymph	3	1.5	1	0
2019	April	2019-04-17	Mountain road	Haemaphysalis longicornis	Female	31	15.5	4	0
2019	April	2019-04-17	Mountain road	Haemaphysalis longicornis	Male	21	10.5	3	0
2019	April	2019-04-17	Mountain road	Haemaphysalis longicornis	Nymph	445	222.5	8	0
2019	April	2019-04-17	Mountain road	Haemaphysalis flava	Female	4	2	1	0
2019	April	2019-04-17	Mountain road	Haemaphysalis flava	Nymph	13	6.5	1	0
2019	April	2019-04-17	Mountain road	Haemaphysalis spp.	Larva	139	69.5	2	0
2019	April	2019-04-17	Mountain road	Ixodes nipponensis	Nymph	1	0.5	1	0
2019	April	2019-04-17	Mixed forest	Haemaphysalis longicornis	Female	30	15	3	0
2019	April	2019-04-17	Mixed forest	Haemaphysalis longicornis	Male	17	8.5	2	0
2019	April	2019-04-17	Mixed forest	Haemaphysalis longicornis	Nymph	119	59.5	2	0
2019	April	2019-04-17	Mixed forest	Haemaphysalis flava	Female	10	5	1	0
2019	April	2019-04-17	Mixed forest	Haemaphysalis flava	Male	3	1.5	1	0
2019	April	2019-04-17	Mixed forest	Haemaphysalis flava	Nymph	50	25	1	0
2019	April	2019-04-17	Mixed forest	Ixodes nipponensis	Male	1	0.5	1	0
2019	April	2019-04-17	Cemetery	Haemaphysalis longicornis	Female	9	4.5	1	0
2019	April	2019-04-17	Cemetery	Haemaphysalis longicornis	Male	5	2.5	1	0
2019	April	2019-04-17	Cemetery	Haemaphysalis longicornis	Nymph	243	121.5	5	0
2019	April	2019-04-17	Cemetery	Haemaphysalis flava	Female	1	0.5	1	0
2019	April	2019-04-17	Cemetery	Haemaphysalis flava	Nymph	17	8.5	1	0
2019	April	2019-04-17	Cemetery	Haemaphysalis spp.	Larva	2	1	1	0
2019	May	2019-05-16	Grassland	Haemaphysalis longicornis	Female	88	44	9	0
2019	May	2019-05-16	Grassland	Haemaphysalis longicornis	Male	40	20	4	0
2019	May	2019-05-16	Grassland	Haemaphysalis longicornis	Nymph	2281	1140.5	39	0
2019	May	2019-05-16	Grassland	Haemaphysalis flava	Female	1	0.5	1	0
2019	May	2019-05-16	Grassland	Haemaphysalis flava	Nymph	6	3	1	0
2019	May	2019-05-16	Grassland	Haemaphysalis spp.	Larva	1	0.5	1	0
2019	May	2019-05-17	Grassland	Ixodes nipponensis	Nymph	1	0.5	1	0
2019	May	2019-05-16	Mountain road	Haemaphysalis longicornis	Female	59	29.5	6	0
2019	May	2019-05-16	Mountain road	Haemaphysalis longicornis	Male	39	19.5	4	0
2019	May	2019-05-16	Mountain road	Haemaphysalis longicornis	Nymph	699	349.5	12	0
2019	May	2019-05-16	Mountain road	Haemaphysalis flava	Male	1	0.5	1	0
2019	May	2019-05-16	Mountain road	Haemaphysalis spp.	Larva	63	31.5	1	0
2019	May	2019-05-16	Mountain road	Ixodes nipponensis	Nymph	1	0.5	1	0
2019	May	2019-05-16	Mixed forest	Haemaphysalis longicornis	Female	26	13	3	0
2019	May	2019-05-16	Mixed forest	Haemaphysalis longicornis	Male	6	3	1	0
2019	May	2019-05-16	Mixed forest	Haemaphysalis longicornis	Nymph	84	42	2	0
2019	May	2019-05-16	Mixed forest	Haemaphysalis spp.	Larva	3	1.5	1	0
2019	May	2019-05-16	Cemetery	Haemaphysalis longicornis	Female	7	3.5	1	0
2019	May	2019-05-16	Cemetery	Haemaphysalis longicornis	Male	8	4	1	0
2019	May	2019-05-16	Cemetery	Haemaphysalis longicornis	Nymph	147	73.5	3	0
2019	May	2019-05-16	Cemetery	Haemaphysalis flava	Female	1	0.5	1	0
2019	May	2019-05-16	Cemetery	Haemaphysalis flava	Male	2	1	1	0
2019	May	2019-05-16	Cemetery	Haemaphysalis spp.	Larva	1	0.5	1	0
2019	June	2019-06-21	Grassland	Haemaphysalis longicornis	Female	286	143	29	0
2019	June	2019-06-21	Grassland	Haemaphysalis longicornis	Male	99	49.5	10	0
2019	June	2019-06-21	Grassland	Haemaphysalis longicornis	Nymph	2221	1110.5	38	0
2019	June	2019-06-21	Grassland	Haemaphysalis flava	Female	1	0.5	1	0
2019	June	2019-06-21	Grassland	Haemaphysalis flava	Nymph	1	0.5	1	0
2019	June	2019-06-21	Mountain road	Haemaphysalis longicornis	Female	480	240	48	0
2019	June	2019-06-21	Mountain road	Haemaphysalis longicornis	Male	97	48.5	10	0
2019	June	2019-06-21	Mountain road	Haemaphysalis longicornis	Nymph	108	54	2	0
2019	June	2019-06-21	Mountain road	Haemaphysalis flava	Female	1	0.5	1	0
2019	June	2019-06-21	Mixed forest	Haemaphysalis longicornis	Female	303	151.5	31	0
2019	June	2019-06-21	Mixed forest	Haemaphysalis longicornis	Male	97	48.5	10	0
2019	June	2019-06-21	Mixed forest	Haemaphysalis longicornis	Nymph	196	98	4	0
2019	June	2019-06-21	Mixed forest	Haemaphysalis flava	Nymph	1	0.5	1	0
2019	June	2019-06-21	Mixed forest	Haemaphysalis spp.	Larva	2	1	1	0
2019	June	2019-06-21	Cemetery	Haemaphysalis longicornis	Female	168	84	17	0
2019	June	2019-06-21	Cemetery	Haemaphysalis longicornis	Male	49	24.5	5	0
2019	June	2019-06-21	Cemetery	Haemaphysalis longicornis	Nymph	69	34.5	2	0
2019	June	2019-06-21	Cemetery	Haemaphysalis spp.	Larva	1	0.5	1	0
2019	June	2019-06-21	Cemetery	Ixodes nipponensis	Larva	1	0.5	1	0
2019	July	2019-07-19	Grassland	Haemaphysalis longicornis	Female	291	145.5	30	0
2019	July	2019-07-19	Grassland	Haemaphysalis longicornis	Male	64	32	7	0
2019	July	2019-07-19	Grassland	Haemaphysalis longicornis	Nymph	499	249.5	9	0
2019	July	2019-07-19	Grassland	Haemaphysalis flava	Female	1	0.5	1	0
2019	July	2019-07-19	Grassland	Haemaphysalis spp.	Larva	7	3.5	1	0
2019	July	2019-07-19	Grassland	Ixodes nipponensis	Larva	69	34.5	1	0
2019	July	2019-07-19	Mountain road	Haemaphysalis longicornis	Female	1749	874.5	175	0
2019	July	2019-07-19	Mountain road	Haemaphysalis longicornis	Male	271	135.5	28	0
2019	July	2019-07-19	Mountain road	Haemaphysalis longicornis	Nymph	188	94	4	0
2019	July	2019-07-19	Mountain road	Haemaphysalis flava	Female	1	0.5	1	0
2019	July	2019-07-19	Mountain road	Haemaphysalis flava	Male	1	0.5	1	0
2019	July	2019-07-19	Mountain road	Haemaphysalis flava	Nymph	1	0.5	1	0
2019	July	2019-07-19	Mountain road	Haemaphysalis spp.	Larva	214	107	3	0
2019	July	2019-07-19	Mountain road	Ixodes nipponensis	Larva	1	0.5	1	0
2019	July	2019-07-19	Mixed forest	Haemaphysalis longicornis	Female	284	142	29	0
2019	July	2019-07-19	Mixed forest	Haemaphysalis longicornis	Male	65	32.5	7	0
2019	July	2019-07-19	Mixed forest	Haemaphysalis longicornis	Nymph	43	21.5	1	0
2019	July	2019-07-19	Mixed forest	Haemaphysalis spp.	Larva	15	7.5	1	0
2019	July	2019-07-19	Mixed forest	Ixodes nipponensis	Larva	2	1	1	0
2019	July	2019-07-19	Cemetery	Haemaphysalis longicornis	Female	281	140.5	29	0
2019	July	2019-07-19	Cemetery	Haemaphysalis longicornis	Male	81	40.5	9	0
2019	July	2019-07-19	Cemetery	Haemaphysalis longicornis	Nymph	82	41	2	0
2019	July	2019-07-19	Cemetery	Haemaphysalis spp.	Larva	53	26.5	1	0
2019	August	2019-08-19	Grassland	Haemaphysalis longicornis	Female	7	3.5	1	0
2019	August	2019-08-19	Grassland	Haemaphysalis longicornis	Nymph	11	5.5	1	0
2019	August	2019-08-19	Grassland	Haemaphysalis spp.	Larva	146	73	2	0
2019	August	2019-08-19	Grassland	Ixodes nipponensis	Larva	5	2.5	1	0
2019	August	2019-08-19	Mountain road	Haemaphysalis longicornis	Female	88	44	9	0
2019	August	2019-08-19	Mountain road	Haemaphysalis longicornis	Male	4	2	1	0
2019	August	2019-08-19	Mountain road	Haemaphysalis longicornis	Nymph	11	5.5	1	0
2019	August	2019-08-19	Mountain road	Haemaphysalis spp.	Larva	689	344.5	7	0
2019	August	2019-08-19	Mountain road	Ixodes nipponensis	Larva	4	2	1	0
2019	August	2019-08-19	Mixed forest	Haemaphysalis longicornis	Female	45	22.5	5	0
2019	August	2019-08-19	Mixed forest	Haemaphysalis longicornis	Male	7	3.5	1	0
2019	August	2019-08-19	Mixed forest	Haemaphysalis longicornis	Nymph	8	4	1	0
2019	August	2019-08-19	Mixed forest	Haemaphysalis spp.	Larva	2328	1164	24	0
2019	August	2019-08-19	Mixed forest	Ixodes nipponensis	Larva	9	4.5	1	0
2019	August	2019-08-19	Cemetery	Haemaphysalis longicornis	Female	67	33.5	7	0
2019	August	2019-08-19	Cemetery	Haemaphysalis longicornis	Male	5	2.5	1	0
2019	August	2019-08-19	Cemetery	Haemaphysalis longicornis	Nymph	5	2.5	1	0
2019	August	2019-08-19	Cemetery	Haemaphysalis spp.	Larva	345	172.5	4	0
2019	September	2019-09-18	Grassland	Haemaphysalis longicornis	Female	1	0.5	1	0
2019	September	2019-09-18	Grassland	Haemaphysalis longicornis	Nymph	24	12	1	0
2019	September	2019-09-18	Grassland	Haemaphysalis flava	Female	3	1.5	1	0
2019	September	2019-09-18	Grassland	Haemaphysalis flava	Male	4	2	1	0
2019	September	2019-09-18	Grassland	Haemaphysalis spp.	Larva	877	438.5	9	0
2019	September	2019-09-18	Mountain road	Haemaphysalis longicornis	Female	1	0.5	1	0
2019	September	2019-09-18	Mountain road	Haemaphysalis longicornis	Nymph	19	9.5	1	0
2019	September	2019-09-18	Mountain road	Haemaphysalis flava	Female	6	3	1	0
2019	September	2019-09-18	Mountain road	Haemaphysalis flava	Male	7	3.5	1	0
2019	September	2019-09-18	Mountain road	Haemaphysalis spp.	Larva	162	81	2	0
2019	September	2019-09-18	Mixed forest	Haemaphysalis longicornis	Female	1	0.5	1	0
2019	September	2019-09-18	Mixed forest	Haemaphysalis longicornis	Male	1	0.5	1	0
2019	September	2019-09-18	Mixed forest	Haemaphysalis longicornis	Nymph	306	153	6	0
2019	September	2019-09-18	Mixed forest	Haemaphysalis flava	Female	10	5	1	0
2019	September	2019-09-18	Mixed forest	Haemaphysalis flava	Male	13	6.5	2	0
2019	September	2019-09-18	Mixed forest	Haemaphysalis flava	Nymph	4	2	1	0
2019	September	2019-09-18	Mixed forest	Haemaphysalis spp.	Larva	4	2	1	0
2019	September	2019-09-18	Cemetery	Haemaphysalis longicornis	Nymph	11	5.5	1	0
2019	September	2019-09-18	Cemetery	Haemaphysalis flava	Male	1	0.5	1	0
2019	September	2019-09-18	Cemetery	Haemaphysalis spp.	Larva	63	31.5	1	0
2019	October	2019-10-19	Grassland	Haemaphysalis flava	Female	3	1.5	1	0
2019	October	2019-10-19	Grassland	Haemaphysalis flava	Male	1	0.5	1	0
2019	October	2019-10-19	Grassland	Haemaphysalis flava	Nymph	6	3	1	0
2019	October	2019-10-19	Grassland	Haemaphysalis spp.	Larva	38	19	1	0
2019	October	2019-10-19	Grassland	Ixodes nipponensis	Female	1	0.5	1	0
2019	October	2019-10-19	Grassland	Ixodes nipponensis	Male	1	0.5	1	0
2019	October	2019-10-19	Mountain road	Haemaphysalis flava	Female	3	1.5	1	0
2019	October	2019-10-19	Mountain road	Haemaphysalis flava	Male	3	1.5	1	0
2019	October	2019-10-19	Mountain road	Haemaphysalis flava	Nymph	1	0.5	1	0
2019	October	2019-10-19	Mountain road	Haemaphysalis spp.	Larva	31	15.5	1	0
2019	October	2019-10-19	Mixed forest	Haemaphysalis flava	Female	9	4.5	1	0
2019	October	2019-10-19	Mixed forest	Haemaphysalis flava	Male	4	2	1	0
2019	October	2019-10-19	Mixed forest	Haemaphysalis flava	Nymph	4	2	1	0
2019	October	2019-10-19	Mixed forest	Haemaphysalis spp.	Larva	1	0.5	1	0
2019	October	2019-10-19	Cemetery	Haemaphysalis flava	Female	2	1	1	0
2019	October	2019-10-19	Cemetery	Haemaphysalis flava	Male	3	1.5	1	0
2019	October	2019-10-19	Cemetery	Haemaphysalis spp.	Larva	1	0.5	1	0
2019	November	2019-11-22	Grassland	Haemaphysalis longicornis	Male	1	0.5	1	0
2019	November	2019-11-22	Grassland	Haemaphysalis longicornis	Nymph	2	1	1	0
2019	November	2019-11-22	Grassland	Haemaphysalis spp.	Larva	1	0.5	1	0
2019	November	2019-11-22	Grassland	Ixodes nipponensis	Male	1	0.5	1	0
2019	November	2019-11-22	Mountain road	Haemaphysalis flava	Female	3	1.5	1	0
2019	November	2019-11-22	Mountain road	Haemaphysalis flava	Nymph	1	0.5	1	0
2019	November	2019-11-22	Mixed forest	NA	NA	NA	NA	NA	NA
2019	November	2019-11-22	Cemetery	NA	NA	NA	NA	NA	NA
2020	April	2020-04-25	Grassland	Haemaphysalis longicornis	Female	17	8.5	2	0
2020	April	2020-04-25	Grassland	Haemaphysalis longicornis	Male	15	7.5	2	0
2020	April	2020-04-25	Grassland	Haemaphysalis longicornis	Nymph	132	66	3	0
2020	April	2020-04-25	Mountain road	Haemaphysalis longicornis	Female	145	72.5	15	0
2020	April	2020-04-25	Mountain road	Haemaphysalis longicornis	Male	74	37	8	0
2020	April	2020-04-25	Mountain road	Haemaphysalis longicornis	Nymph	579	289.5	10	0
2020	April	2020-04-25	Mountain road	Haemaphysalis flava	Female	13	6.5	2	0
2020	April	2020-04-25	Mountain road	Haemaphysalis flava	Male	2	1	1	0
2020	April	2020-04-25	Mountain road	Haemaphysalis flava	Nymph	10	5	1	0
2020	April	2020-04-25	Mountain road	Haemaphysalis spp.	Larva	6	3	1	0
2020	April	2020-04-25	Mountain road	Ixodes nipponensis	Female	1	0.5	1	0
2020	April	2020-04-25	Mixed forest	Haemaphysalis longicornis	Female	13	6.5	2	0
2020	April	2020-04-25	Mixed forest	Haemaphysalis longicornis	Male	4	2	1	0
2020	April	2020-04-25	Mixed forest	Haemaphysalis longicornis	Nymph	27	13.5	1	0
2020	April	2020-04-25	Cemetery	Haemaphysalis longicornis	Female	3	1.5	1	0
2020	April	2020-04-25	Cemetery	Haemaphysalis longicornis	Nymph	17	8.5	1	0
2020	May	2020-05-24	Grassland	Haemaphysalis longicornis	Female	92	46	10	0
2020	May	2020-05-24	Grassland	Haemaphysalis longicornis	Male	50	25	5	0
2020	May	2020-05-24	Grassland	Haemaphysalis longicornis	Nymph	631	315.5	11	0
2020	May	2020-05-24	Grassland	Haemaphysalis flava	Nymph	1	0.5	1	0
2020	May	2020-05-24	Grassland	Haemaphysalis spp.	Larva	1	0.5	1	0
2020	May	2020-05-24	Grassland	Ixodes nipponensis	Nymph	4	2	1	0
2020	May	2020-05-24	Mountain road	Haemaphysalis longicornis	Female	120	60	12	0
2020	May	2020-05-24	Mountain road	Haemaphysalis longicornis	Male	46	23	5	0
2020	May	2020-05-24	Mountain road	Haemaphysalis longicornis	Nymph	315	157.5	6	0
2020	May	2020-05-24	Mountain road	Haemaphysalis flava	Female	5	2.5	1	0
2020	May	2020-05-24	Mountain road	Haemaphysalis flava	Nymph	1	0.5	1	0
2020	May	2020-05-24	Mountain road	Haemaphysalis spp.	Larva	18	9	1	0
2020	May	2020-05-24	Mixed forest	Haemaphysalis longicornis	Female	35	17.5	4	0
2020	May	2020-05-24	Mixed forest	Haemaphysalis longicornis	Male	7	3.5	1	0
2020	May	2020-05-24	Mixed forest	Haemaphysalis longicornis	Nymph	57	28.5	1	0
2020	May	2020-05-24	Mixed forest	Haemaphysalis flava	Female	1	0.5	1	0
2020	May	2020-05-24	Cemetery	Haemaphysalis longicornis	Female	17	8.5	2	0
2020	May	2020-05-24	Cemetery	Haemaphysalis longicornis	Male	8	4	4	0
2020	May	2020-05-24	Cemetery	Haemaphysalis longicornis	Nymph	22	11	1	0
2020	May	2020-05-24	Cemetery	Haemaphysalis flava	Male	1	0.5	1	0
2020	May	2020-05-24	Cemetery	Haemaphysalis flava	Nymph	2	1	1	0
2020	June	2020-06-20	Grassland	Haemaphysalis longicornis	Female	154	77	16	0
2020	June	2020-06-20	Grassland	Haemaphysalis longicornis	Male	57	28.5	6	0
2020	June	2020-06-20	Grassland	Haemaphysalis longicornis	Nymph	269	134.5	5	0
2020	June	2020-06-20	Grassland	Haemaphysalis flava	Male	1	0.5	1	0
2020	June	2020-06-20	Grassland	Haemaphysalis flava	Nymph	2	1	1	0
2020	June	2020-06-20	Grassland	Haemaphysalis spp.	Larva	9	4.5	1	0
2020	June	2020-06-20	Grassland	Ixodes nipponensis	Nymph	1	0.5	1	0
2020	June	2020-06-20	Mountain road	Haemaphysalis longicornis	Female	303	151.5	31	0
2020	June	2020-06-20	Mountain road	Haemaphysalis longicornis	Male	73	36.5	8	0
2020	June	2020-06-20	Mountain road	Haemaphysalis longicornis	Nymph	432	216	8	0
2020	June	2020-06-20	Mountain road	Haemaphysalis flava	Male	1	0.5	1	0
2020	June	2020-06-20	Mountain road	Haemaphysalis flava	Nymph	4	2	1	0
2020	June	2020-06-20	Mountain road	Haemaphysalis spp.	Larva	133	66.5	2	0
2020	June	2020-06-20	Mixed forest	Haemaphysalis longicornis	Female	37	18.5	4	0
2020	June	2020-06-20	Mixed forest	Haemaphysalis longicornis	Male	11	5.5	2	0
2020	June	2020-06-20	Mixed forest	Haemaphysalis longicornis	Nymph	11	5.5	1	0
2020	June	2020-06-20	Cemetery	Haemaphysalis longicornis	Female	93	46.5	10	0
2020	June	2020-06-20	Cemetery	Haemaphysalis longicornis	Male	29	14.5	3	0
2020	June	2020-06-20	Cemetery	Haemaphysalis longicornis	Nymph	162	81	3	0
2020	July	2020-07-18	Grassland	Haemaphysalis longicornis	Female	406	203	41	0
2020	July	2020-07-18	Grassland	Haemaphysalis longicornis	Male	148	74	15	0
2020	July	2020-07-18	Grassland	Haemaphysalis longicornis	Nymph	604	302	11	0
2020	July	2020-07-18	Grassland	Haemaphysalis flava	Male	2	1	1	0
2020	July	2020-07-18	Grassland	Haemaphysalis flava	Nymph	43	21.5	1	0
2020	July	2020-07-18	Grassland	Haemaphysalis spp.	Larva	635	317.5	7	0
2020	July	2020-07-18	Grassland	Ixodes nipponensis	Larva	432	216	5	0
2020	July	2020-07-18	Mountain road	Haemaphysalis longicornis	Female	156	78	16	0
2020	July	2020-07-18	Mountain road	Haemaphysalis longicornis	Male	26	13	3	0
2020	July	2020-07-18	Mountain road	Haemaphysalis longicornis	Nymph	28	14	1	0
2020	July	2020-07-18	Mountain road	Haemaphysalis flava	Male	1	0.5	1	0
2020	July	2020-07-18	Mixed forest	Haemaphysalis longicornis	Female	27	13.5	3	0
2020	July	2020-07-18	Mixed forest	Haemaphysalis longicornis	Male	9	4.5	1	0
2020	July	2020-07-18	Mixed forest	Haemaphysalis longicornis	Nymph	1	0.5	1	0
2020	July	2020-07-18	Mixed forest	Haemaphysalis spp.	Larva	1	0.5	1	0
2020	July	2020-07-18	Cemetery	Haemaphysalis longicornis	Female	7	3.5	1	0
2020	July	2020-07-18	Cemetery	Haemaphysalis longicornis	Male	2	1	1	0
2020	July	2020-07-18	Cemetery	Haemaphysalis longicornis	Nymph	1	0.5	1	0
2020	August	2020-08-19	Grassland	Haemaphysalis longicornis	Female	18	9	2	0
2020	August	2020-08-19	Grassland	Haemaphysalis longicornis	Male	3	1.5	1	0
2020	August	2020-08-19	Grassland	Haemaphysalis longicornis	Nymph	17	8.5	1	0
2020	August	2020-08-19	Grassland	Haemaphysalis flava	Male	1	0.5	1	0
2020	August	2020-08-19	Grassland	Haemaphysalis spp.	Larva	1770	885	18	0
2020	August	2020-08-19	Grassland	Ixodes nipponensis	Larva	13	6.5	1	0
2020	August	2020-08-19	Mountain road	Haemaphysalis longicornis	Female	48	24	5	0
2020	August	2020-08-19	Mountain road	Haemaphysalis longicornis	Male	2	1	1	0
2020	August	2020-08-19	Mountain road	Haemaphysalis longicornis	Nymph	26	13	1	0
2020	August	2020-08-19	Mountain road	Haemaphysalis flava	Female	3	1.5	1	0
2020	August	2020-08-19	Mountain road	Haemaphysalis flava	Male	7	3.5	1	0
2020	August	2020-08-19	Mountain road	Haemaphysalis spp.	Larva	1	0.5	1	0
2020	August	2020-08-19	Mixed forest	Haemaphysalis longicornis	Female	14	7	2	0
2020	August	2020-08-19	Mixed forest	Haemaphysalis longicornis	Nymph	1	0.5	1	0
2020	August	2020-08-19	Mixed forest	Haemaphysalis flava	Male	1	0.5	1	0
2020	August	2020-08-19	Mixed forest	Haemaphysalis spp.	Larva	9	4.5	1	0
2020	August	2020-08-19	Cemetery	Haemaphysalis longicornis	Female	5	2.5	1	0
2020	August	2020-08-19	Cemetery	Haemaphysalis longicornis	Nymph	5	2.5	1	0
2020	August	2020-08-19	Cemetery	Haemaphysalis spp.	Larva	27	13.5	1	0
2020	September	2020-09-19	Grassland	Haemaphysalis longicornis	Female	1	0.5	1	0
2020	September	2020-09-19	Grassland	Haemaphysalis longicornis	Nymph	108	54	2	0
2020	September	2020-09-19	Grassland	Haemaphysalis flava	Female	6	3	1	0
2020	September	2020-09-19	Grassland	Haemaphysalis flava	Male	9	4.5	1	0
2020	September	2020-09-19	Grassland	Haemaphysalis flava	Nymph	3	1.5	1	0
2020	September	2020-09-19	Grassland	Haemaphysalis spp.	Larva	37	18.5	1	0
2020	September	2020-09-19	Mountain road	Haemaphysalis longicornis	Female	3	1.5	1	0
2020	September	2020-09-19	Mountain road	Haemaphysalis longicornis	Nymph	5	2.5	1	0
2020	September	2020-09-19	Mountain road	Haemaphysalis flava	Female	17	8.5	2	0
2020	September	2020-09-19	Mountain road	Haemaphysalis flava	Male	19	9.5	2	0
2020	September	2020-09-19	Mountain road	Haemaphysalis flava	Nymph	4	2	1	0
2020	September	2020-09-19	Mountain road	Haemaphysalis spp.	Larva	4	2	1	0
2020	September	2020-09-19	Mixed forest	Haemaphysalis longicornis	Female	2	1	1	0
2020	September	2020-09-19	Mixed forest	Haemaphysalis longicornis	Nymph	14	7	1	0
2020	September	2020-09-19	Mixed forest	Haemaphysalis flava	Female	19	9.5	2	0
2020	September	2020-09-19	Mixed forest	Haemaphysalis flava	Male	14	7	2	0
2020	September	2020-09-19	Mixed forest	Haemaphysalis flava	Nymph	1	0.5	1	0
2020	September	2020-09-19	Cemetery	Haemaphysalis longicornis	Nymph	3	1.5	1	0
2020	September	2020-09-19	Cemetery	Haemaphysalis spp.	Larva	1	0.5	1	0
2020	October	2020-10-22	Grassland	Haemaphysalis flava	Female	2	1	1	0
2020	October	2020-10-22	Grassland	Haemaphysalis flava	Male	1	0.5	1	0
2020	October	2020-10-22	Grassland	Haemaphysalis flava	Nymph	1	0.5	1	0
2020	October	2020-10-22	Grassland	Haemaphysalis spp.	Larva	17	8.5	1	0
2020	October	2020-10-22	Mountain road	Haemaphysalis longicornis	Nymph	1	0.5	1	0
2020	October	2020-10-22	Mountain road	Haemaphysalis flava	Female	2	1	1	0
2020	October	2020-10-22	Mountain road	Haemaphysalis flava	Male	1	0.5	1	0
2020	October	2020-10-22	Mountain road	Haemaphysalis flava	Nymph	4	2	1	0
2020	October	2020-10-22	Mixed forest	Haemaphysalis flava	Female	3	1.5	1	0
2020	October	2020-10-22	Mixed forest	Haemaphysalis flava	Male	2	1	1	0
2020	October	2020-10-22	Mixed forest	Haemaphysalis flava	Nymph	1	0.5	1	0
2020	October	2020-10-22	Cemetery	Haemaphysalis flava	Female	2	1	1	0
2020	October	2020-10-22	Cemetery	Haemaphysalis flava	Male	2	1	1	0
2020	October	2020-10-22	Cemetery	Haemaphysalis flava	Nymph	3	1.5	1	0
2020	November	2020-11-20	Grassland	NA	NA	NA	NA	NA	NA
2020	November	2020-11-20	Mountain road	NA	NA	NA	NA	NA	NA
2020	November	2020-11-20	Mixed forest	NA	NA	NA	NA	NA	NA
2020	November	2020-11-20	Cemetery	NA	NA	NA	NA	NA	NA
2021	April	2021-04-20	Grassland	Haemaphysalis longicornis	Female	37	18.5	4	0
2021	April	2021-04-20	Grassland	Haemaphysalis longicornis	Male	16	8	2	0
2021	April	2021-04-20	Grassland	Haemaphysalis longicornis	Nymph	438	219	8	0
2021	April	2021-04-20	Grassland	Haemaphysalis flava	Female	2	1	1	0
2021	April	2021-04-20	Grassland	Haemaphysalis flava	Male	1	0.5	1	0
2021	April	2021-04-20	Grassland	Haemaphysalis flava	Nymph	2	1	1	0
2021	April	2021-04-20	Grassland	Haemaphysalis spp.	Larva	2	1	1	0
2021	April	2021-04-20	Mountain road	Haemaphysalis longicornis	Female	11	5.5	2	0
2021	April	2021-04-20	Mountain road	Haemaphysalis longicornis	Male	3	1.5	1	0
2021	April	2021-04-20	Mountain road	Haemaphysalis longicornis	Nymph	85	42.5	2	0
2021	April	2021-04-20	Mountain road	Haemaphysalis flava	Female	1	0.5	1	0
2021	April	2021-04-20	Mountain road	Haemaphysalis flava	Male	4	2	1	0
2021	April	2021-04-20	Mixed forest	Haemaphysalis longicornis	Female	3	1.5	1	0
2021	April	2021-04-20	Mixed forest	Haemaphysalis longicornis	Male	1	0.5	1	0
2021	April	2021-04-20	Mixed forest	Haemaphysalis longicornis	Nymph	2	1	1	0
2021	April	2021-04-20	Mixed forest	Haemaphysalis flava	Female	1	0.5	1	0
2021	April	2021-04-20	Mixed forest	Haemaphysalis flava	Nymph	1	0.5	1	0
2021	April	2021-04-20	Cemetery	Haemaphysalis longicornis	Nymph	1	0.5	1	0
2021	May	2021-05-19	Grassland	Haemaphysalis longicornis	Female	227	113.5	23	0
2021	May	2021-05-19	Grassland	Haemaphysalis longicornis	Male	91	45.5	10	0
2021	May	2021-05-19	Grassland	Haemaphysalis longicornis	Nymph	1646	823	28	0
2021	May	2021-05-19	Grassland	Haemaphysalis flava	Female	3	1.5	1	0
2021	May	2021-05-19	Grassland	Haemaphysalis flava	Male	2	1	1	0
2021	May	2021-05-19	Grassland	Haemaphysalis flava	Nymph	4	2	0	0
2021	May	2021-05-19	Grassland	Haemaphysalis spp.	Larva	18	9	1	0
2021	May	2021-05-19	Grassland	Ixodes nipponensis	Nymph	2	1	1	0
2021	May	2021-05-19	Mountain road	Haemaphysalis longicornis	Female	37	18.5	4	0
2021	May	2021-05-19	Mountain road	Haemaphysalis longicornis	Male	14	7	2	0
2021	May	2021-05-19	Mountain road	Haemaphysalis longicornis	Nymph	257	128.5	5	0
2021	May	2021-05-19	Mountain road	Haemaphysalis flava	Female	1	0.5	1	0
2021	May	2021-05-19	Mountain road	Haemaphysalis flava	Male	3	1.5	1	0
2021	May	2021-05-19	Mountain road	Haemaphysalis flava	Nymph	5	2.5	1	0
2021	May	2021-05-19	Mountain road	Haemaphysalis spp.	Larva	1	0.5	1	0
2021	May	2021-05-19	Mountain road	Ixodes nipponensis	Nymph	2	1	1	0
2021	May	2021-05-19	Mixed forest	Haemaphysalis longicornis	Female	44	22	5	0
2021	May	2021-05-19	Mixed forest	Haemaphysalis longicornis	Male	9	4.5	1	0
2021	May	2021-05-19	Mixed forest	Haemaphysalis longicornis	Nymph	34	17	1	0
2021	May	2021-05-19	Mixed forest	Haemaphysalis flava	Female	1	0.5	1	0
2021	May	2021-05-19	Mixed forest	Haemaphysalis flava	Male	1	0.5	1	0
2021	May	2021-05-19	Mixed forest	Haemaphysalis flava	Nymph	1	0.5	0	0
2021	May	2021-05-19	Cemetery	Haemaphysalis longicornis	Female	22	11	3	0
2021	May	2021-05-19	Cemetery	Haemaphysalis longicornis	Male	15	7.5	2	0
2021	May	2021-05-19	Cemetery	Haemaphysalis longicornis	Nymph	261	130.5	5	0
2021	June	2021-06-17	Grassland	Haemaphysalis longicornis	Female	270	135	27	0
2021	June	2021-06-17	Grassland	Haemaphysalis longicornis	Male	67	33.5	7	0
2021	June	2021-06-17	Grassland	Haemaphysalis longicornis	Nymph	2640	1320	44	0
2021	June	2021-06-17	Grassland	Haemaphysalis flava	Male	2	1	1	0
2021	June	2021-06-17	Grassland	Haemaphysalis flava	Nymph	5	2.5	1	0
2021	June	2021-06-17	Grassland	Haemaphysalis spp.	Larva	43	21.5	1	0
2021	June	2021-06-17	Mountain road	Haemaphysalis longicornis	Female	47	23.5	5	0
2021	June	2021-06-17	Mountain road	Haemaphysalis longicornis	Male	13	6.5	2	0
2021	June	2021-06-17	Mountain road	Haemaphysalis longicornis	Nymph	62	31	2	0
2021	June	2021-06-17	Mountain road	Haemaphysalis spp.	Larva	1	0.5	1	0
2021	June	2021-06-17	Mixed forest	Haemaphysalis longicornis	Female	141	70.5	15	0
2021	June	2021-06-17	Mixed forest	Haemaphysalis longicornis	Male	38	19	4	0
2021	June	2021-06-17	Mixed forest	Haemaphysalis longicornis	Nymph	33	16.5	1	0
2021	June	2021-06-17	Cemetery	Haemaphysalis longicornis	Female	49	24.5	5	0
2021	June	2021-06-17	Cemetery	Haemaphysalis longicornis	Male	12	6	2	0
2021	June	2021-06-17	Cemetery	Haemaphysalis longicornis	Nymph	91	45.5	2	0
2021	July	2021-07-23	Grassland	Haemaphysalis longicornis	Female	201	100.5	21	0
2021	July	2021-07-23	Grassland	Haemaphysalis longicornis	Male	43	21.5	5	0
2021	July	2021-07-23	Grassland	Haemaphysalis longicornis	Nymph	22	11	1	0
2021	July	2021-07-23	Grassland	Ixodes nipponensis	Larva	1	0.5	1	0
2021	July	2021-07-23	Mountain road	Haemaphysalis longicornis	Female	48	24	5	0
2021	July	2021-07-23	Mountain road	Haemaphysalis longicornis	Male	10	5	1	0
2021	July	2021-07-23	Mountain road	Haemaphysalis longicornis	Nymph	7	3.5	1	0
2021	July	2021-07-23	Mountain road	Ixodes nipponensis	Larva	1	0.5	1	0
2021	July	2021-07-23	Mixed forest	Haemaphysalis longicornis	Female	26	13	3	0
2021	July	2021-07-23	Mixed forest	Haemaphysalis longicornis	Male	6	3	1	0
2021	July	2021-07-23	Mixed forest	Haemaphysalis longicornis	Nymph	1	0.5	1	0
2021	July	2021-07-23	Cemetery	Haemaphysalis longicornis	Female	25	12.5	3	0
2021	July	2021-07-23	Cemetery	Haemaphysalis longicornis	Male	7	3.5	1	0
2021	July	2021-07-23	Cemetery	Haemaphysalis longicornis	Nymph	2	1	1	0
2021	July	2021-07-23	Cemetery	Haemaphysalis spp.	Larva	1	0.5	1	0
2021	August	2021-08-22	Grassland	Haemaphysalis longicornis	Female	11	5.5	2	0
2021	August	2021-08-22	Grassland	Haemaphysalis longicornis	Nymph	20	10	1	0
2021	August	2021-08-22	Grassland	Haemaphysalis spp.	Larva	25	12.5	1	0
2021	August	2021-08-22	Mountain road	Haemaphysalis longicornis	Female	2	1	1	0
2021	August	2021-08-22	Mountain road	Haemaphysalis longicornis	Male	1	0.5	1	0
2021	August	2021-08-22	Mountain road	Haemaphysalis flava	Male	1	0.5	1	0
2021	August	2021-08-22	Mountain road	Haemaphysalis spp.	Larva	1	0.5	1	0
2021	August	2021-08-22	Mixed forest	Haemaphysalis longicornis	Female	2	1	1	0
2021	August	2021-08-22	Cemetery	Haemaphysalis longicornis	Female	1	0.5	1	0
2021	August	2021-08-22	Cemetery	Haemaphysalis spp.	Larva	14	7	1	0
2021	September	2021-09-15	Grassland	Haemaphysalis longicornis	Female	1	0.5	1	0
2021	September	2021-09-15	Grassland	Haemaphysalis longicornis	Nymph	44	22	1	0
2021	September	2021-09-15	Grassland	Haemaphysalis flava	Female	10	5	1	0
2021	September	2021-09-15	Grassland	Haemaphysalis flava	Male	10	5	1	0
2021	September	2021-09-15	Grassland	Haemaphysalis flava	Nymph	6	3	1	0
2021	September	2021-09-15	Grassland	Haemaphysalis spp.	Larva	450	225	5	0
2021	September	2021-09-15	Mountain road	Haemaphysalis longicornis	Nymph	12	6	1	0
2021	September	2021-09-15	Mountain road	Haemaphysalis flava	Female	3	1.5	1	0
2021	September	2021-09-15	Mountain road	Haemaphysalis flava	Male	6	3	1	0
2021	September	2021-09-15	Mountain road	Haemaphysalis flava	Nymph	5	2.5	1	0
2021	September	2021-09-15	Mountain road	Haemaphysalis spp.	Larva	500	250	5	0
2021	September	2021-09-15	Mixed forest	Haemaphysalis flava	Female	10	5	1	0
2021	September	2021-09-15	Mixed forest	Haemaphysalis flava	Male	9	4.5	1	0
2021	September	2021-09-15	Mixed forest	Haemaphysalis flava	Nymph	6	3	1	0
2021	September	2021-09-15	Mixed forest	Haemaphysalis spp.	Larva	164	82	2	0
2021	September	2021-09-15	Cemetery	Haemaphysalis longicornis	Nymph	3	1.5	1	0
2021	September	2021-09-15	Cemetery	Haemaphysalis flava	Female	1	0.5	1	0
2021	September	2021-09-15	Cemetery	Haemaphysalis flava	Male	1	0.5	1	0
2021	September	2021-09-15	Cemetery	Haemaphysalis spp.	Larva	137	68.5	2	0
2021	October	2021-10-22	Grassland	Haemaphysalis longicornis	Nymph	1	0.5	1	0
2021	October	2021-10-22	Grassland	Haemaphysalis flava	Female	12	6	2	0
2021	October	2021-10-22	Grassland	Haemaphysalis flava	Male	3	1.5	1	0
2021	October	2021-10-22	Grassland	Haemaphysalis flava	Nymph	4	2	1	0
2021	October	2021-10-22	Grassland	Haemaphysalis spp.	Larva	22	11	1	0
2021	October	2021-10-22	Mountain road	Haemaphysalis longicornis	Nymph	1	0.5	1	0
2021	October	2021-10-22	Mountain road	Haemaphysalis flava	Female	2	1	1	0
2021	October	2021-10-22	Mountain road	Haemaphysalis flava	Male	1	0.5	1	0
2021	October	2021-10-22	Mountain road	Haemaphysalis flava	Nymph	5	2.5	1	0
2021	October	2021-10-22	Mountain road	Haemaphysalis spp.	Larva	6	3	1	0
2021	October	2021-10-22	Mixed forest	Haemaphysalis flava	Female	1	0.5	1	0
2021	October	2021-10-22	Mixed forest	Haemaphysalis flava	Nymph	3	1.5	1	0
2021	October	2021-10-22	Cemetery	Haemaphysalis flava	Female	1	0.5	1	0
2021	October	2021-10-22	Cemetery	Haemaphysalis flava	Male	1	0.5	1	0
2021	October	2021-10-22	Cemetery	Haemaphysalis spp.	Larva	1	0.5	1	0
2021	November	2021-11-16	Grassland	Haemaphysalis flava	Female	2	1	1	0
2021	November	2021-11-16	Grassland	Haemaphysalis flava	Male	5	2.5	1	0
2021	November	2021-11-16	Grassland	Haemaphysalis flava	Nymph	1	0.5	1	0
2021	November	2021-11-16	Grassland	Haemaphysalis spp.	Larva	6	3	1	0
2021	November	2021-11-16	Mountain road	Haemaphysalis flava	Nymph	1	0.5	1	0
2021	November	2021-11-16	Mixed forest	Haemaphysalis flava	Male	1	0.5	1	0
2021	November	2021-11-16	Cemetery	Haemaphysalis flava	Female	1	0.5	1	0
2021	November	2021-11-16	Cemetery	Haemaphysalis flava	Male	2	1	1	0
2021	November	2021-11-16	Cemetery	Haemaphysalis flava	Nymph	1	0.5	1	0
2021	November	2021-11-16	Cemetery	Haemaphysalis spp.	Larva	2	1	1	0
2022	April	2022-04-20	Grassland	Haemaphysalis longicornis	Female	38	19	4	0
2022	April	2022-04-20	Grassland	Haemaphysalis longicornis	Male	21	10.5	3	0
2022	April	2022-04-20	Grassland	Haemaphysalis longicornis	Nymph	279	139.5	5	0
2022	April	2022-04-20	Grassland	Haemaphysalis flava	Female	2	1	1	0
2022	April	2022-04-20	Grassland	Haemaphysalis flava	Nymph	5	2.5	1	0
2022	April	2022-04-20	Mountain road	Haemaphysalis longicornis	Female	19	9.5	2	0
2022	April	2022-04-20	Mountain road	Haemaphysalis longicornis	Male	9	4.5	1	0
2022	April	2022-04-20	Mountain road	Haemaphysalis longicornis	Nymph	16	8	1	0
2022	April	2022-04-20	Mountain road	Haemaphysalis flava	Female	6	3	1	0
2022	April	2022-04-20	Mountain road	Haemaphysalis flava	Male	1	0.5	1	0
2022	April	2022-04-20	Mountain road	Haemaphysalis flava	Nymph	10	5	1	0
2022	April	2022-04-20	Mixed forest	Haemaphysalis longicornis	Female	2	1	1	0
2022	April	2022-04-20	Mixed forest	Haemaphysalis longicornis	Nymph	4	2	1	0
2022	April	2022-04-20	Mixed forest	Haemaphysalis flava	Female	1	0.5	1	0
2022	April	2022-04-20	Mixed forest	Haemaphysalis flava	Nymph	1	0.5	1	0
2022	April	2022-04-20	Mixed forest	Ixodes nipponensis	Nymph	1	0.5	1	0
2022	April	2022-04-20	Cemetery	Haemaphysalis longicornis	Female	4	2	1	0
2022	April	2022-04-20	Cemetery	Haemaphysalis longicornis	Male	1	0.5	1	0
2022	April	2022-04-20	Cemetery	Haemaphysalis longicornis	Nymph	46	23	1	0
2022	May	2022-05-18	Grassland	Haemaphysalis longicornis	Female	58	29	6	0
2022	May	2022-05-18	Grassland	Haemaphysalis longicornis	Male	32	16	4	0
2022	May	2022-05-18	Grassland	Haemaphysalis longicornis	Nymph	684	342	12	0
2022	May	2022-05-18	Grassland	Haemaphysalis flava	Male	1	0.5	1	0
2022	May	2022-05-18	Grassland	Haemaphysalis flava	Nymph	1	0.5	1	0
2022	May	2022-05-18	Mountain road	Haemaphysalis longicornis	Female	14	7	2	0
2022	May	2022-05-18	Mountain road	Haemaphysalis longicornis	Male	8	4	1	0
2022	May	2022-05-18	Mountain road	Haemaphysalis longicornis	Nymph	95	47.5	2	0
2022	May	2022-05-18	Mountain road	Haemaphysalis flava	Female	3	1.5	1	0
2022	May	2022-05-18	Mountain road	Haemaphysalis flava	Male	1	0.5	1	0
2022	May	2022-05-18	Mountain road	Haemaphysalis flava	Nymph	1	0.5	1	0
2022	May	2022-05-18	Mixed forest	Haemaphysalis longicornis	Female	7	3.5	1	0
2022	May	2022-05-18	Mixed forest	Haemaphysalis longicornis	Male	1	0.5	1	0
2022	May	2022-05-18	Mixed forest	Haemaphysalis longicornis	Nymph	8	4	1	0
2022	May	2022-05-18	Mixed forest	Haemaphysalis flava	Female	1	0.5	1	0
2022	May	2022-05-18	Cemetery	Haemaphysalis longicornis	Female	5	2.5	1	0
2022	May	2022-05-18	Cemetery	Haemaphysalis longicornis	Male	13	6.5	2	0
2022	May	2022-05-18	Cemetery	Haemaphysalis longicornis	Nymph	84	42	2	0
2022	May	2022-05-18	Cemetery	Haemaphysalis flava	Male	1	0.5	1	0
2022	June	2022-06-17	Grassland	Haemaphysalis longicornis	Female	126	63	13	0
2022	June	2022-06-17	Grassland	Haemaphysalis longicornis	Male	48	24	5	0
2022	June	2022-06-17	Grassland	Haemaphysalis longicornis	Nymph	553	276.5	10	0
2022	June	2022-06-17	Grassland	Haemaphysalis flava	Female	1	0.5	1	0
2022	June	2022-06-17	Grassland	Haemaphysalis flava	Nymph	5	2.5	1	0
2022	June	2022-06-17	Grassland	Haemaphysalis spp.	Larva	1	0.5	1	0
2022	June	2022-06-17	Mountain road	Haemaphysalis longicornis	Female	34	17	4	0
2022	June	2022-06-17	Mountain road	Haemaphysalis longicornis	Male	14	7	2	0
2022	June	2022-06-17	Mountain road	Haemaphysalis longicornis	Nymph	76	38	2	0
2022	June	2022-06-17	Mountain road	Haemaphysalis flava	Female	1	0.5	1	0
2022	June	2022-06-17	Mountain road	Haemaphysalis flava	Nymph	25	12.5	1	0
2022	June	2022-06-17	Mixed forest	Haemaphysalis longicornis	Female	65	32.5	7	0
2022	June	2022-06-17	Mixed forest	Haemaphysalis longicornis	Male	14	7	2	0
2022	June	2022-06-17	Mixed forest	Haemaphysalis longicornis	Nymph	20	10	1	0
2022	June	2022-06-17	Mixed forest	Ixodes nipponensis	Nymph	1	0.5	1	0
2022	June	2022-06-17	Cemetery	Haemaphysalis longicornis	Female	112	56	12	0
2022	June	2022-06-17	Cemetery	Haemaphysalis longicornis	Male	43	21.5	5	0
2022	June	2022-06-17	Cemetery	Haemaphysalis longicornis	Nymph	92	46	2	0
2022	July	2022-07-20	Grassland	Haemaphysalis longicornis	Female	162	81	17	0
2022	July	2022-07-20	Grassland	Haemaphysalis longicornis	Male	48	24	5	0
2022	July	2022-07-20	Grassland	Haemaphysalis longicornis	Nymph	49	24.5	1	0
2022	July	2022-07-20	Grassland	Haemaphysalis flava	Nymph	6	3	1	0
2022	July	2022-07-20	Mountain road	Haemaphysalis longicornis	Female	35	17.5	4	0
2022	July	2022-07-20	Mountain road	Haemaphysalis longicornis	Male	6	3	1	0
2022	July	2022-07-20	Mountain road	Haemaphysalis longicornis	Nymph	6	3	1	0
2022	July	2022-07-20	Mountain road	Haemaphysalis flava	Male	1	0.5	1	0
2022	July	2022-07-20	Mixed forest	Haemaphysalis longicornis	Female	64	32	7	0
2022	July	2022-07-20	Mixed forest	Haemaphysalis longicornis	Male	14	7	2	0
2022	July	2022-07-20	Mixed forest	Haemaphysalis flava	Male	1	0.5	1	0
2022	July	2022-07-20	Mixed forest	Haemaphysalis flava	Nymph	1	0.5	1	0
2022	July	2022-07-20	Cemetery	Haemaphysalis longicornis	Female	47	23.5	5	0
2022	July	2022-07-20	Cemetery	Haemaphysalis longicornis	Male	14	7	2	0
2022	July	2022-07-20	Cemetery	Haemaphysalis longicornis	Nymph	3	1.5	1	0
2022	August	2022-08-18	Grassland	Haemaphysalis longicornis	Female	30	15	3	0
2022	August	2022-08-18	Grassland	Haemaphysalis longicornis	Male	3	1.5	1	0
2022	August	2022-08-18	Grassland	Haemaphysalis flava	Nymph	7	3.5	1	0
2022	August	2022-08-18	Grassland	Haemaphysalis spp.	Larva	1712	856	18	0
2022	August	2022-08-18	Grassland	Ixodes nipponensis	Larva	55	27.5	1	0
2022	August	2022-08-18	Mountain road	Haemaphysalis longicornis	Female	9	4.5	1	0
2022	August	2022-08-18	Mixed forest	Haemaphysalis longicornis	Female	12	6	2	0
2022	August	2022-08-18	Mixed forest	Haemaphysalis longicornis	Male	1	0.5	1	0
2022	August	2022-08-18	Mixed forest	Haemaphysalis flava	Nymph	1	0.5	1	0
2022	August	2022-08-18	Cemetery	Haemaphysalis longicornis	Female	6	3	1	0
2022	August	2022-08-18	Cemetery	Haemaphysalis longicornis	Male	1	0.5	1	0
2022	September	2022-09-21	Grassland	Haemaphysalis longicornis	Nymph	1	0.5	1	0
2022	September	2022-09-21	Grassland	Haemaphysalis flava	Female	2	1	1	0
2022	September	2022-09-21	Grassland	Haemaphysalis flava	Male	2	1	1	0
2022	September	2022-09-21	Grassland	Haemaphysalis flava	Nymph	4	2	1	0
2022	September	2022-09-21	Grassland	Ixodes nipponensis	Larva	20	10	1	0
2022	September	2022-09-21	Mountain road	Haemaphysalis flava	Female	13	6.5	2	0
2022	September	2022-09-21	Mountain road	Haemaphysalis flava	Male	15	7.5	2	0
2022	September	2022-09-21	Mixed forest	Haemaphysalis flava	Female	3	1.5	1	0
2022	September	2022-09-21	Mixed forest	Haemaphysalis flava	Male	5	2.5	1	0
2022	September	2022-09-21	Cemetery	Haemaphysalis flava	Female	2	1	1	0
2022	September	2022-09-21	Cemetery	Haemaphysalis flava	Male	5	2.5	1	0
2022	September	2022-09-21	Cemetery	Haemaphysalis flava	Nymph	10	5	1	0
2022	September	2022-09-21	Cemetery	Haemaphysalis spp.	Larva	2	1	1	0
2022	October	2022-10-18	Grassland	Haemaphysalis flava	Female	7	3.5	1	0
2022	October	2022-10-18	Grassland	Haemaphysalis flava	Male	6	3	1	0
2022	October	2022-10-18	Grassland	Haemaphysalis flava	Nymph	11	5.5	1	0
2022	October	2022-10-18	Grassland	Haemaphysalis spp.	Larva	17	8.5	1	0
2022	October	2022-10-18	Grassland	Ixodes nipponensis	Female	1	0.5	1	0
2022	October	2022-10-18	Mountain road	Haemaphysalis flava	Female	2	1	1	0
2022	October	2022-10-18	Mountain road	Haemaphysalis flava	Nymph	1	0.5	1	0
2022	October	2022-10-18	Mixed forest	Haemaphysalis flava	Female	3	1.5	1	0
2022	October	2022-10-18	Mixed forest	Haemaphysalis flava	Male	4	2	1	0
2022	October	2022-10-18	Cemetery	Haemaphysalis flava	Female	1	0.5	1	0
2022	November	2022-11-16	Grassland	Haemaphysalis flava	Female	2	1	1	0
2022	November	2022-11-16	Grassland	Haemaphysalis flava	Nymph	1	0.5	1	0
2022	November	2022-11-16	Mountain road	Haemaphysalis flava	Female	2	1	1	0
2022	November	2022-11-16	Mountain road	Haemaphysalis flava	Nymph	1	0.5	1	0
2022	November	2022-11-16	Mixed forest	Haemaphysalis flava	Female	7	3.5	1	0
2022	November	2022-11-16	Mixed forest	Haemaphysalis flava	Male	5	2.5	1	0
2022	November	2022-11-16	Cemetery	Haemaphysalis flava	Male	3	1.5	1	0
2022	November	2022-11-16	Cemetery	Haemaphysalis flava	Nymph	1	0.5	1	0
2023	April	2023-04-20	Grassland	Haemaphysalis longicornis	Female	44	22	5	0
2023	April	2023-04-20	Grassland	Haemaphysalis longicornis	Male	23	11.5	3	0
2023	April	2023-04-20	Grassland	Haemaphysalis longicornis	Nymph	909	454.5	16	0
2023	April	2023-04-20	Grassland	Haemaphysalis flava	Female	5	2.5	1	0
2023	April	2023-04-20	Grassland	Haemaphysalis flava	Male	1	0.5	1	0
2023	April	2023-04-20	Grassland	Haemaphysalis flava	Nymph	9	4.5	1	0
2023	April	2023-04-20	Grassland	Haemaphysalis spp.	Larva	2	1	1	0
2023	April	2023-04-20	Grassland	Ixodes nipponensis	Female	2	1	1	0
2023	April	2023-04-20	Grassland	Ixodes nipponensis	Male	1	0.5	1	0
2023	April	2023-04-20	Grassland	Ixodes nipponensis	Nymph	1	0.5	1	0
2023	April	2023-04-20	Mountain road	Haemaphysalis longicornis	Female	2	1	1	0
2023	April	2023-04-20	Mountain road	Haemaphysalis longicornis	Nymph	11	5.5	1	0
2023	April	2023-04-20	Mountain road	Haemaphysalis flava	Female	2	1	1	0
2023	April	2023-04-20	Mountain road	Ixodes nipponensis	Female	1	0.5	1	0
2023	April	2023-04-20	Mixed forest	Haemaphysalis longicornis	Female	3	1.5	1	0
2023	April	2023-04-20	Mixed forest	Haemaphysalis flava	Female	2	1	1	0
2023	April	2023-04-20	Cemetery	Haemaphysalis longicornis	Female	3	1.5	1	0
2023	April	2023-04-20	Cemetery	Haemaphysalis longicornis	Male	1	0.5	1	0
2023	April	2023-04-20	Cemetery	Haemaphysalis longicornis	Nymph	92	46	2	0
2023	May	2023-05-18	Grassland	Haemaphysalis longicornis	Female	32	16	4	0
2023	May	2023-05-18	Grassland	Haemaphysalis longicornis	Nymph	193	96.5	4	0
2023	May	2023-05-18	Mountain road	Haemaphysalis longicornis	Female	1	0.5	1	0
2023	May	2023-05-18	Mountain road	Haemaphysalis longicornis	Nymph	12	6	1	0
2023	May	2023-05-18	Mixed forest	Haemaphysalis longicornis	Female	7	3.5	1	0
2023	May	2023-05-18	Mixed forest	Haemaphysalis longicornis	Nymph	42	21	1	0
2023	May	2023-05-18	Mixed forest	Haemaphysalis flava	Female	1	0.5	1	0
2023	May	2023-05-18	Cemetery	Haemaphysalis longicornis	Female	2	1	1	0
2023	May	2023-05-18	Cemetery	Haemaphysalis longicornis	Nymph	9	4.5	1	0
2023	June	2023-06-23	Grassland	Haemaphysalis longicornis	Female	15	7.5	2	0
2023	June	2023-06-23	Grassland	Haemaphysalis longicornis	Male	7	3.5	1	0
2023	June	2023-06-23	Grassland	Haemaphysalis longicornis	Nymph	71	35.5	2	0
2023	June	2023-06-23	Grassland	Haemaphysalis spp.	Larva	78	39	1	0
2023	June	2023-06-23	Mountain road	Haemaphysalis longicornis	Female	19	9.5	2	0
2023	June	2023-06-23	Mountain road	Haemaphysalis longicornis	Male	1	0.5	1	0
2023	June	2023-06-23	Mountain road	Haemaphysalis longicornis	Nymph	9	4.5	1	0
2023	June	2023-06-23	Mountain road	Haemaphysalis flava	Nymph	1	0.5	1	0
2023	June	2023-06-23	Mixed forest	Haemaphysalis longicornis	Female	21	10.5	3	0
2023	June	2023-06-23	Mixed forest	Haemaphysalis longicornis	Male	8	4	1	0
2023	June	2023-06-23	Mixed forest	Haemaphysalis longicornis	Nymph	1	0.5	1	0
2023	June	2023-06-23	Mixed forest	Haemaphysalis flava	Female	1	0.5	1	0
2023	June	2023-06-23	Mixed forest	Haemaphysalis flava	Male	1	0.5	1	0
2023	June	2023-06-23	Mixed forest	Haemaphysalis flava	Nymph	1	0.5	1	0
2023	June	2023-06-23	Cemetery	Haemaphysalis longicornis	Female	2	1	1	0
2023	June	2023-06-23	Cemetery	Haemaphysalis longicornis	Male	2	1	1	0
2023	June	2023-06-23	Cemetery	Haemaphysalis longicornis	Nymph	7	3.5	1	0
2023	July	2023-07-20	Grassland	Haemaphysalis longicornis	Female	1148	574	115	0
2023	July	2023-07-20	Grassland	Haemaphysalis longicornis	Male	266	133	27	0
2023	July	2023-07-20	Grassland	Haemaphysalis longicornis	Nymph	120	60	2	0
2023	July	2023-07-20	Grassland	Haemaphysalis flava	Female	2	1	1	0
2023	July	2023-07-20	Grassland	Haemaphysalis flava	Male	1	0.5	1	0
2023	July	2023-07-20	Mountain road	Haemaphysalis longicornis	Female	19	9.5	2	0
2023	July	2023-07-20	Mountain road	Haemaphysalis longicornis	Male	5	2.5	1	0
2023	July	2023-07-20	Mixed forest	Haemaphysalis longicornis	Female	32	16	4	0
2023	July	2023-07-20	Mixed forest	Haemaphysalis longicornis	Male	10	5	1	0
2023	July	2023-07-20	Mixed forest	Haemaphysalis flava	Female	1	0.5	1	0
2023	July	2023-07-20	Cemetery	Haemaphysalis longicornis	Female	36	18	4	0
2023	July	2023-07-20	Cemetery	Haemaphysalis longicornis	Male	13	6.5	2	0
2023	July	2023-07-20	Cemetery	Haemaphysalis longicornis	Nymph	4	2	1	0
2023	August	2023-08-17	Grassland	Haemaphysalis longicornis	Female	24	12	3	0
2023	August	2023-08-17	Grassland	Haemaphysalis longicornis	Nymph	76	38	2	0
2023	August	2023-08-17	Grassland	Haemaphysalis flava	Female	1	0.5	1	0
2023	August	2023-08-17	Grassland	Haemaphysalis spp.	Larva	963	481.5	10	0
2023	August	2023-08-17	Mountain road	Haemaphysalis longicornis	Nymph	1	0.5	1	0
2023	August	2023-08-17	Mixed forest	Haemaphysalis longicornis	Male	1	0.5	1	0
2023	August	2023-08-17	Cemetery	NA	NA	NA	NA	NA	NA
2023	September	2023-09-20	Grassland	Haemaphysalis longicornis	Nymph	51	25.5	1	0
2023	September	2023-09-20	Grassland	Haemaphysalis flava	Female	2	1	1	0
2023	September	2023-09-20	Grassland	Haemaphysalis flava	Male	1	0.5	1	0
2023	September	2023-09-20	Grassland	Haemaphysalis spp.	Larva	1290	645	13	0
2023	September	2023-09-20	Mountain road	Haemaphysalis longicornis	Nymph	1	0.5	1	0
2023	September	2023-09-20	Mountain road	Haemaphysalis flava	Female	1	0.5	1	0
2023	September	2023-09-20	Mountain road	Haemaphysalis flava	Male	2	1	1	0
2023	September	2023-09-20	Mixed forest	Haemaphysalis flava	Female	1	0.5	1	0
2023	September	2023-09-20	Mixed forest	Haemaphysalis flava	Male	2	1	1	0
2023	September	2023-09-20	Cemetery	Haemaphysalis longicornis	Male	1	0.5	1	0
2023	September	2023-09-20	Cemetery	Haemaphysalis longicornis	Nymph	30	15	1	0
2023	October	2023-10-17	Grassland	Haemaphysalis flava	Female	2	1	1	0
2023	October	2023-10-17	Grassland	Haemaphysalis flava	Male	3	1.5	1	0
2023	October	2023-10-17	Grassland	Haemaphysalis flava	Nymph	2	1	1	0
2023	October	2023-10-17	Grassland	Haemaphysalis spp.	Larva	150	75	2	0
2023	October	2023-10-17	Grassland	Ixodes nipponensis	Female	1	0.5	1	0
2023	October	2023-10-17	Grassland	Ixodes nipponensis	Male	1	0.5	1	0
2023	October	2023-10-17	Grassland	Ixodes nipponensis	Nymph	1	0.5	1	0
2023	October	2023-10-17	Mountain road	Haemaphysalis flava	Female	1	0.5	1	0
2023	October	2023-10-17	Mountain road	Haemaphysalis flava	Male	1	0.5	1	0
2023	October	2023-10-17	Mountain road	Haemaphysalis flava	Nymph	2	1	1	0
2023	October	2023-10-17	Mountain road	Haemaphysalis spp.	Larva	7	3.5	1	0
2023	October	2023-10-17	Mixed forest	Haemaphysalis flava	Female	4	2	1	0
2023	October	2023-10-17	Mixed forest	Haemaphysalis flava	Male	4	2	1	0
2023	October	2023-10-17	Mixed forest	Haemaphysalis flava	Nymph	2	1	1	0
2023	October	2023-10-17	Mixed forest	Ixodes nipponensis	Male	1	0.5	1	0
2023	October	2023-10-17	Cemetery	Haemaphysalis flava	Female	2	1	1	0
2023	November	2023-11-14	Grassland	NA	NA	NA	NA	NA	NA
2023	November	2023-11-14	Mountain road	Haemaphysalis flava	Female	1	0.5	1	0
2023	November	2023-11-14	Mountain road	Haemaphysalis flava	Male	1	0.5	1	0
2023	November	2023-11-14	Mountain road	Haemaphysalis flava	Nymph	1	0.5	1	0
2023	November	2023-11-14	Mixed forest	Haemaphysalis flava	Female	2	1	1	0
2023	November	2023-11-14	Cemetery	Haemaphysalis flava	Female	1	0.5	1	0
2024	April	2024-04-17	Grassland	Haemaphysalis longicornis	Female	56	28	6	0
2024	April	2024-04-17	Grassland	Haemaphysalis longicornis	Male	26	13	3	0
2024	April	2024-04-17	Grassland	Haemaphysalis longicornis	Nymph	200	100	4	0
2024	April	2024-04-17	Grassland	Haemaphysalis flava	Nymph	2	1	1	0
2024	April	2024-04-17	Grassland	Ixodes nipponensis	Nymph	1	0.5	1	0
2024	April	2024-04-17	Grassland	Ixodes nipponensis	Male	1	0.5	1	0
2024	April	2024-04-17	Mountain road	Haemaphysalis longicornis	Female	6	3	1	0
2024	April	2024-04-17	Mountain road	Haemaphysalis longicornis	Male	1	0.5	1	0
2024	April	2024-04-17	Mountain road	Haemaphysalis longicornis	Nymph	13	6.5	1	0
2024	April	2024-04-17	Mountain road	Haemaphysalis flava	Female	2	1	1	0
2024	April	2024-04-17	Mountain road	Haemaphysalis flava	Male	1	0.5	1	0
2024	April	2024-04-17	Mountain road	Haemaphysalis flava	Nymph	2	1	1	0
2024	April	2024-04-17	Mixed forest	Haemaphysalis longicornis	Female	10	5	1	0
2024	April	2024-04-17	Mixed forest	Haemaphysalis longicornis	Male	2	1	1	0
2024	April	2024-04-17	Mixed forest	Haemaphysalis longicornis	Nymph	7	3.5	1	0
2024	April	2024-04-17	Mixed forest	Haemaphysalis flava	Nymph	1	0.5	1	0
2024	April	2024-04-17	Cemetery	Haemaphysalis longicornis	Female	24	12	3	0
2024	April	2024-04-17	Cemetery	Haemaphysalis longicornis	Male	6	3	1	0
2024	April	2024-04-17	Cemetery	Haemaphysalis longicornis	Nymph	174	87	3	0
2024	April	2024-04-17	Cemetery	Haemaphysalis flava	Male	1	0.5	1	0
2024	May	2024-05-14	Grassland	Haemaphysalis longicornis	Female	205	102.5	21	0
2024	May	2024-05-14	Grassland	Haemaphysalis longicornis	Male	78	39	8	0
2024	May	2024-05-14	Grassland	Haemaphysalis longicornis	Nymph	485	242.5	9	0
2024	May	2024-05-14	Grassland	Haemaphysalis flava	Nymph	4	2	1	0
2024	May	2024-05-14	Mountain road	Haemaphysalis longicornis	Female	6	3	1	0
2024	May	2024-05-14	Mountain road	Haemaphysalis longicornis	Nymph	14	7	1	0
2024	May	2024-05-14	Mountain road	Haemaphysalis flava	Nymph	12	6	1	0
2024	May	2024-05-14	Mixed forest	Haemaphysalis longicornis	Female	40	20	4	0
2024	May	2024-05-14	Mixed forest	Haemaphysalis longicornis	Male	7	3.5	1	0
2024	May	2024-05-14	Mixed forest	Haemaphysalis flava	Nymph	4	2	1	0
2024	May	2024-05-14	Cemetery	Haemaphysalis longicornis	Female	30	15	3	0
2024	May	2024-05-14	Cemetery	Haemaphysalis longicornis	Male	6	3	1	0
2024	May	2024-05-14	Cemetery	Haemaphysalis longicornis	Nymph	106	53	2	0
2024	May	2024-05-14	Cemetery	Haemaphysalis flava	Nymph	1	0.5	1	0
2024	May	2024-05-14	Cemetery	Haemaphysalis spp.	Larva	7	3.5	1	0
2024	May	2024-05-14	Cemetery	Ixodes nipponensis	Nymph	2	1	1	0
2024	June	2024-06-18	Grassland	Haemaphysalis longicornis	Female	188	94	19	0
2024	June	2024-06-18	Grassland	Haemaphysalis longicornis	Male	80	40	8	0
2024	June	2024-06-18	Grassland	Haemaphysalis longicornis	Nymph	749	374.5	13	0
2024	June	2024-06-18	Grassland	Haemaphysalis flava	Female	1	0.5	1	0
2024	June	2024-06-18	Grassland	Haemaphysalis spp.	Larva	5	2.5	1	0
2024	June	2024-06-18	Mountain road	Haemaphysalis longicornis	Female	7	3.5	1	0
2024	June	2024-06-18	Mountain road	Haemaphysalis longicornis	Male	1	0.5	1	0
2024	June	2024-06-18	Mountain road	Haemaphysalis longicornis	Nymph	9	4.5	1	0
2024	June	2024-06-18	Mixed forest	Haemaphysalis longicornis	Female	14	7	2	0
2024	June	2024-06-18	Mixed forest	Haemaphysalis longicornis	Nymph	9	4.5	1	0
2024	June	2024-06-18	Cemetery	Haemaphysalis longicornis	Female	55	27.5	6	0
2024	June	2024-06-18	Cemetery	Haemaphysalis longicornis	Male	14	7	2	0
2024	June	2024-06-18	Cemetery	Haemaphysalis longicornis	Nymph	13	6.5	1	0
2024	July	2024-07-16	Grassland	Haemaphysalis longicornis	Female	349	174.5	35	0
2024	July	2024-07-16	Grassland	Haemaphysalis longicornis	Male	87	43.5	9	0
2024	July	2024-07-16	Grassland	Haemaphysalis longicornis	Nymph	271	135.5	5	0
2024	July	2024-07-16	Grassland	Ixodes nipponensis	Nymph	2	1	1	0
2024	July	2024-07-16	Mountain road	Haemaphysalis longicornis	Female	34	17	4	0
2024	July	2024-07-16	Mountain road	Haemaphysalis longicornis	Male	6	3	1	0
2024	July	2024-07-16	Mountain road	Haemaphysalis longicornis	Nymph	1	0.5	1	0
2024	July	2024-07-16	Mountain road	Haemaphysalis flava	Nymph	1	0.5	1	0
2024	July	2024-07-16	Mixed forest	Haemaphysalis longicornis	Female	19	9.5	2	0
2024	July	2024-07-16	Mixed forest	Haemaphysalis longicornis	Nymph	1	0.5	1	0
2024	July	2024-07-16	Cemetery	Haemaphysalis longicornis	Female	63	31.5	7	0
2024	July	2024-07-16	Cemetery	Haemaphysalis longicornis	Male	4	2	1	0
2024	July	2024-07-16	Cemetery	Haemaphysalis longicornis	Nymph	4	2	1	0
2024	July	2024-07-16	Cemetery	Haemaphysalis spp.	Larva	22	11	1	0
2024	August	2024-08-20	Grassland	Haemaphysalis longicornis	Female	7	3.5	1	0
2024	August	2024-08-20	Grassland	Haemaphysalis longicornis	Male	3	1.5	1	0
2024	August	2024-08-20	Grassland	Haemaphysalis longicornis	Nymph	38	19	1	0
2024	August	2024-08-20	Grassland	Haemaphysalis spp.	Larva	137	68.5	2	0
2024	August	2024-08-20	Mountain road	Haemaphysalis longicornis	Female	4	2	1	0
2024	August	2024-08-20	Mountain road	Haemaphysalis longicornis	Male	1	0.5	1	0
2024	August	2024-08-20	Mountain road	Haemaphysalis longicornis	Nymph	5	2.5	1	0
2024	August	2024-08-20	Mountain road	Haemaphysalis flava	Female	1	0.5	1	0
2024	August	2024-08-20	Mountain road	Haemaphysalis spp.	Larva	178	89	2	0
2024	August	2024-08-20	Mixed forest	Haemaphysalis longicornis	Female	1	0.5	1	0
2024	August	2024-08-20	Mixed forest	Haemaphysalis flava	Male	1	0.5	1	0
2024	August	2024-08-20	Cemetery	Haemaphysalis longicornis	Female	5	2.5	1	0
2024	August	2024-08-20	Cemetery	Haemaphysalis longicornis	Male	1	0.5	1	0
2024	August	2024-08-20	Cemetery	Haemaphysalis spp.	Larva	33	16.5	1	0
2024	September	2024-09-20	Grassland	Haemaphysalis longicornis	Female	3	1.5	1	0
2024	September	2024-09-20	Grassland	Haemaphysalis longicornis	Nymph	243	121.5	5	0
2024	September	2024-09-20	Grassland	Haemaphysalis flava	Female	1	0.5	1	0
2024	September	2024-09-20	Grassland	Haemaphysalis flava	Male	1	0.5	1	0
2024	September	2024-09-20	Grassland	Haemaphysalis flava	Nymph	7	3.5	1	0
2024	September	2024-09-20	Grassland	Haemaphysalis spp.	Larva	919	459.5	10	0
2024	September	2024-09-20	Mountain road	Haemaphysalis flava	Male	1	0.5	1	0
2024	September	2024-09-20	Mountain road	Haemaphysalis spp.	Larva	11	5.5	1	0
2024	September	2024-09-20	Mixed forest	Haemaphysalis longicornis	Female	2	1	1	0
2024	September	2024-09-20	Mixed forest	Haemaphysalis flava	Male	3	1.5	1	0
2024	September	2024-09-20	Mixed forest	Haemaphysalis spp.	Larva	3	1.5	1	0
2024	September	2024-09-20	Cemetery	Haemaphysalis longicornis	Female	1	0.5	1	0
2024	September	2024-09-20	Cemetery	Haemaphysalis longicornis	Nymph	2	1	1	0
2024	September	2024-09-20	Cemetery	Haemaphysalis spp.	Larva	50	25	1	0
2024	October	2024-10-17	Grassland	Haemaphysalis flava	Female	3	1.5	1	0
2024	October	2024-10-17	Grassland	Haemaphysalis flava	Male	2	1	1	0
2024	October	2024-10-17	Grassland	Haemaphysalis flava	Nymph	6	3	1	0
2024	October	2024-10-17	Grassland	Haemaphysalis spp.	Larva	73	36.5	1	0
2024	October	2024-10-17	Mountain road	Haemaphysalis flava	Female	3	1.5	1	0
2024	October	2024-10-17	Mountain road	Haemaphysalis flava	Nymph	1	0.5	1	0
2024	October	2024-10-17	Mountain road	Haemaphysalis spp.	Larva	3	1.5	1	0
2024	October	2024-10-17	Mixed forest	Haemaphysalis flava	Female	1	0.5	1	0
2024	October	2024-10-17	Cemetery	Haemaphysalis flava	Male	1	0.5	1	0
2024	October	2024-10-17	Cemetery	Haemaphysalis spp.	Larva	2	1	1	0
2024	November	2024-11-14	Grassland	Haemaphysalis flava	Female	1	0.5	1	0
2024	November	2024-11-14	Grassland	Haemaphysalis flava	Nymph	4	2	1	0
2024	November	2024-11-14	Mountain road	NA	NA	NA	NA	NA	NA
2024	November	2024-11-14	Mixed forest	NA	NA	NA	NA	NA	NA
2024	November	2024-11-14	Cemetery	Haemaphysalis flava	Female	2	1	1	0
Total						72956	36478	3106	0

## Sheet: Sheet22
2018	Jan.	Feb.	Mar.	Apr.	May.	Jun.	Jul.	Aug.	Sep.	Oct.	Nov.	Dec	total
Grassland	NA	NA	NA	620	861	230	372	337	1722	195	7	NA	4344
Mountain road	NA	NA	NA	100	590	225	676	409	1032	195	7	NA	3234
Mixed forest	NA	NA	NA	267	451	408	1069	778	4555	53	5	NA	7586
Cemetery	NA	NA	NA	132	822	161	297	21	390	8	1	NA	1832
total	0	0	0	1119	2724	1024	2414	1545	7699	451	20	0	16996
2019	Jan.	Feb.	Mar.	Apr.	May.	Jun.	Jul.	Aug.	Sep.	Oct.	Nov.	Dec	total
Grassland	NA	NA	NA	3075	2418	2608	931	169	909	50	5	NA	10165
Mountain road	NA	NA	NA	654	862	686	2426	796	195	38	4	NA	5661
Mixed forest	NA	NA	NA	230	119	599	409	2397	339	18	0	NA	4111
Cemetery	NA	NA	NA	277	166	288	497	422	75	6	0	NA	1731
total	NA	NA	NA	4236	3565	4181	4263	3784	1518	112	9	NA	21668
2020	Jan.	Feb.	Mar.	Apr.	May.	Jun.	Jul.	Aug.	Sep.	Oct.	Nov.	Dec	total
Grassland	NA	NA	NA	164	779	493	2270	1822	164	21	0	NA	5713
Mountain road	NA	NA	NA	830	505	946	211	87	52	8	0	NA	2639
Mixed forest	NA	NA	NA	44	100	59	38	25	50	6	0	NA	322
Cemetery	NA	NA	NA	20	50	284	10	37	4	7	0	NA	412
total	NA	NA	NA	1058	1434	1782	2529	1971	270	42	0	NA	9086
2021	Jan.	Feb.	Mar.	Apr.	May.	Jun.	Jul.	Aug.	Sep.	Oct.	Nov.	Dec	total
Grassland	NA	NA	NA	498	1993	3027	267	56	521	42	14	NA	6418
Mountain road	NA	NA	NA	104	320	123	66	5	526	15	1	NA	1160
Mixed forest	NA	NA	NA	8	90	212	33	2	189	4	1	NA	539
Cemetery	NA	NA	NA	1	298	152	35	15	142	3	6	NA	652
total	NA	NA	NA	611	2701	3514	401	78	1378	64	22	NA	8769
2022	Jan.	Feb.	Mar.	Apr.	May.	Jun.	Jul.	Aug.	Sep.	Oct.	Nov.	Dec	total
Grassland	NA	NA	NA	345	776	734	265	1807	29	42	3	NA	4001
Mountain road	NA	NA	NA	61	122	150	48	9	28	3	3	NA	424
Mixed forest	NA	NA	NA	9	17	100	80	14	8	7	12	NA	247
Cemetery	NA	NA	NA	51	103	247	64	7	19	1	4	NA	496
total	NA	NA	NA	466	1018	1231	457	1837	84	53	22	NA	5168
2023	Jan.	Feb.	Mar.	Apr.	May.	Jun.	Jul.	Aug.	Sep.	Oct.	Nov.	Dec	total
Grassland	NA	NA	NA	997	225	171	1537	1064	1344	160	0	NA	5498
Mountain road	NA	NA	NA	16	13	30	24	1	4	11	3	NA	102
Mixed forest	NA	NA	NA	5	50	33	43	1	3	11	2	NA	148
Cemetery	NA	NA	NA	96	11	11	53	0	31	2	1	NA	205
total	NA	NA	NA	1114	299	245	1657	1066	1382	184	6	NA	5953
2024	Jan.	Feb.	Mar.	Apr.	May.	Jun.	Jul.	Aug.	Sep.	Oct.	Nov.	Dec	total
Grassland	NA	NA	NA	286	772	1023	709	185	1174	84	5	NA	4238
Mountain road	NA	NA	NA	25	32	17	42	189	12	7	0	NA	324
Mixed forest	NA	NA	NA	20	51	23	20	2	8	1	0	NA	125
Cemetery	NA	NA	NA	205	152	82	93	39	53	3	2	NA	629
total	NA	NA	NA	536	1007	1145	864	415	1247	95	7	NA	5316
